# Supplementary material
Source: PubMed Central journal article supplement (PMC2675960)

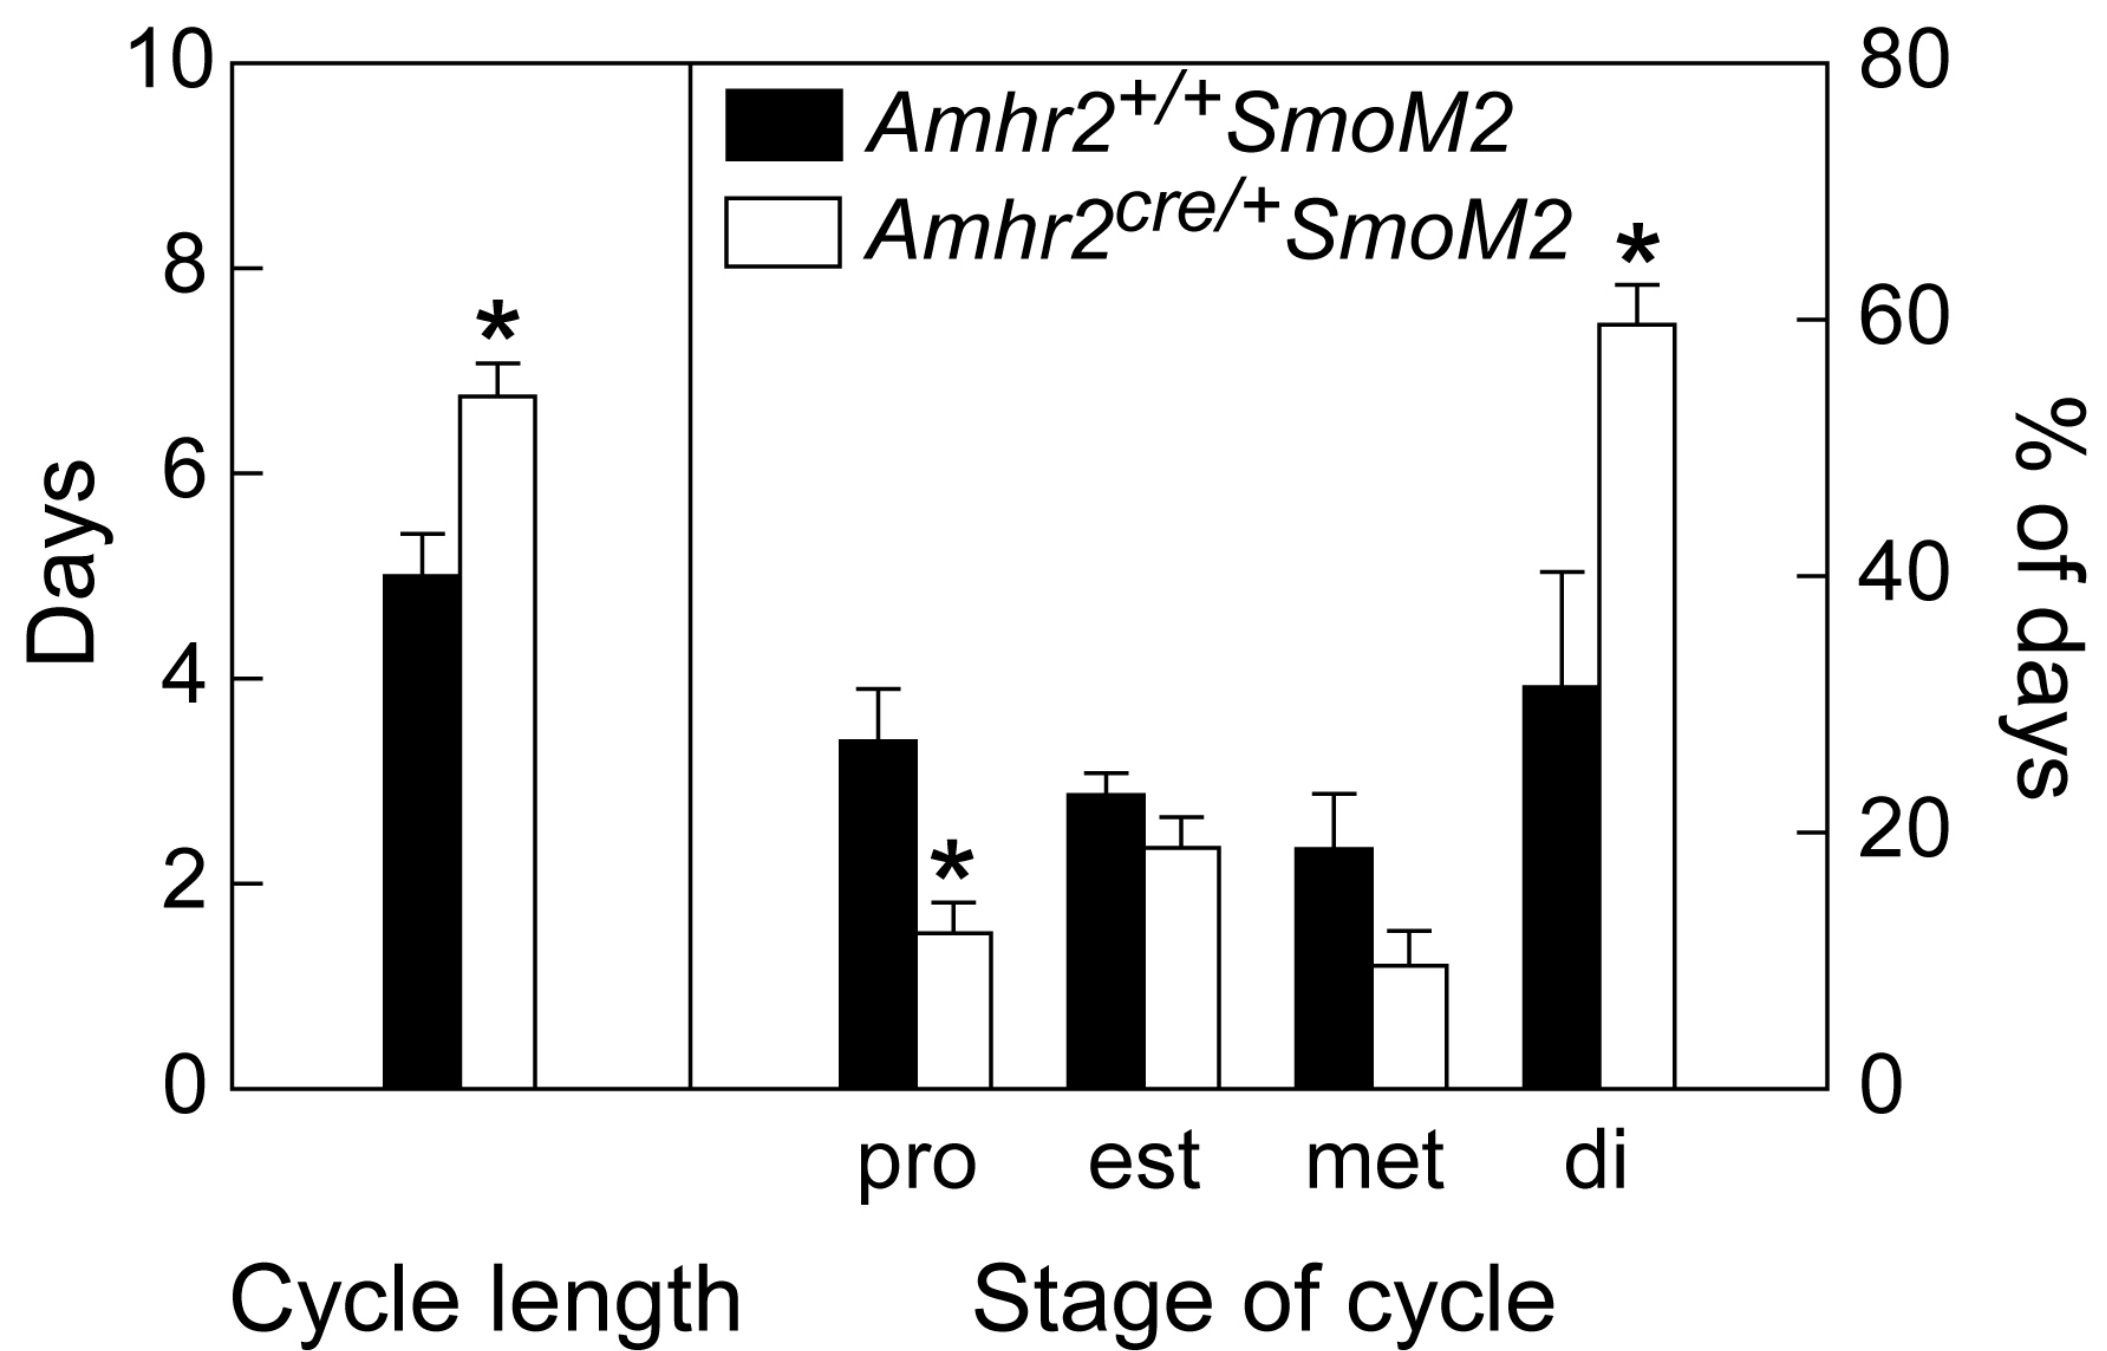

Supplemental figure 1

Supplement: me.2008-0391_1.pdf [file me.2008-0391_1.pdf]

*Amhr2<sup>+/+</sup> SmoM2*

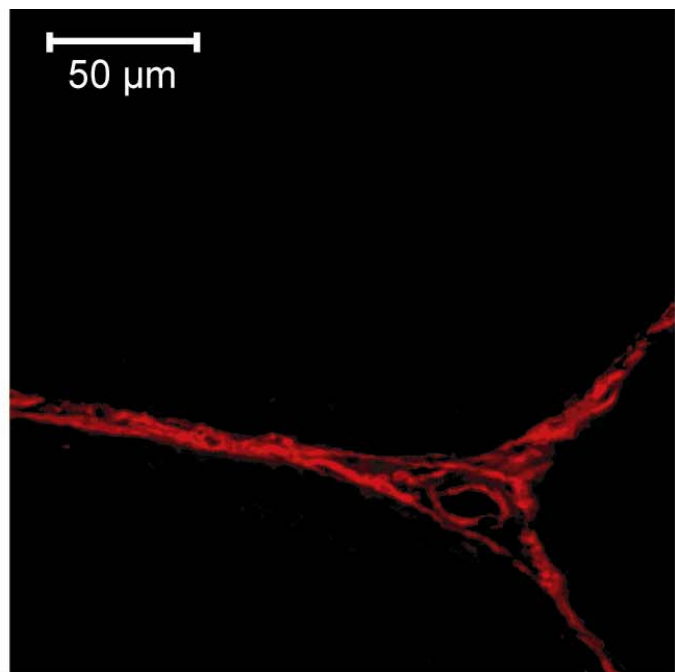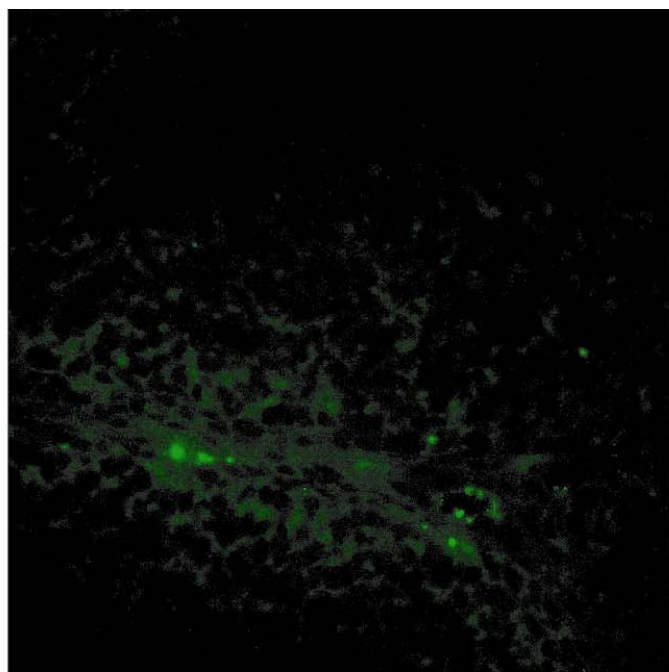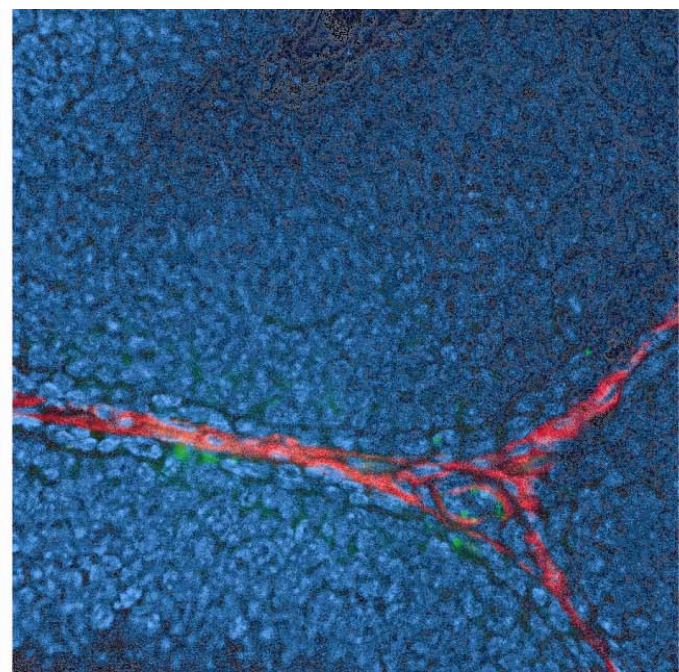

*Amhr2<sup>cre/+</sup> SmoM2*

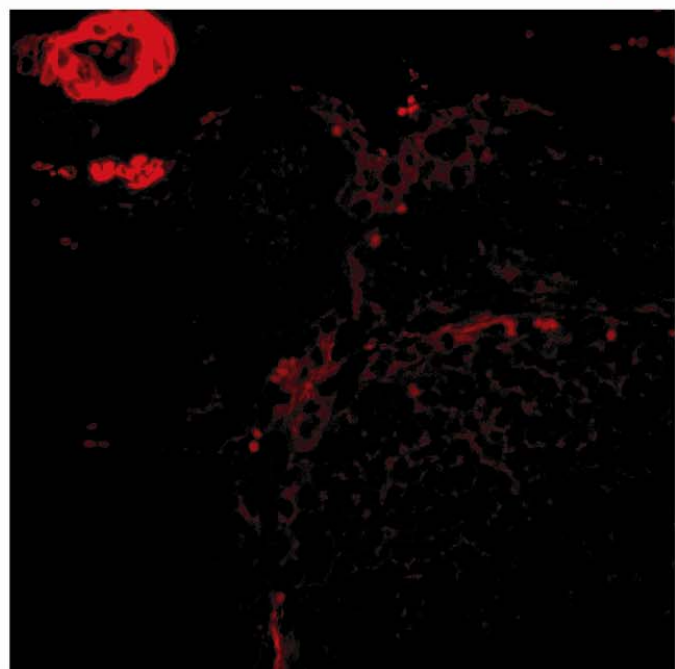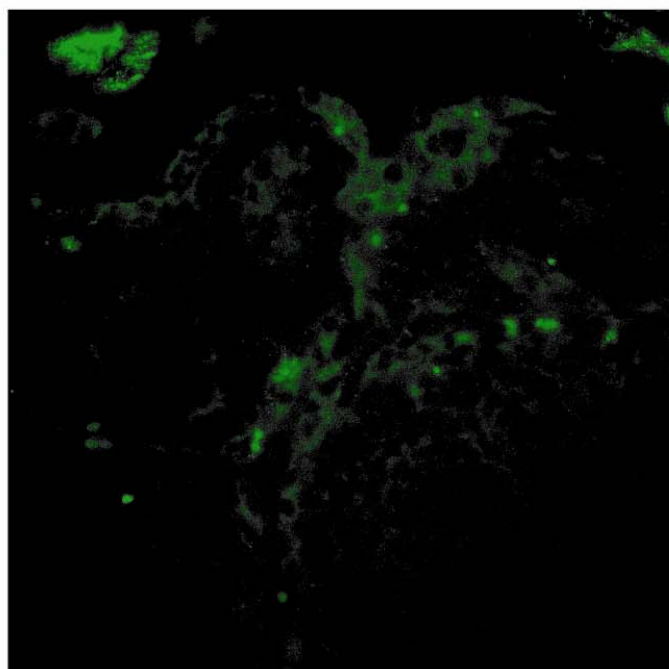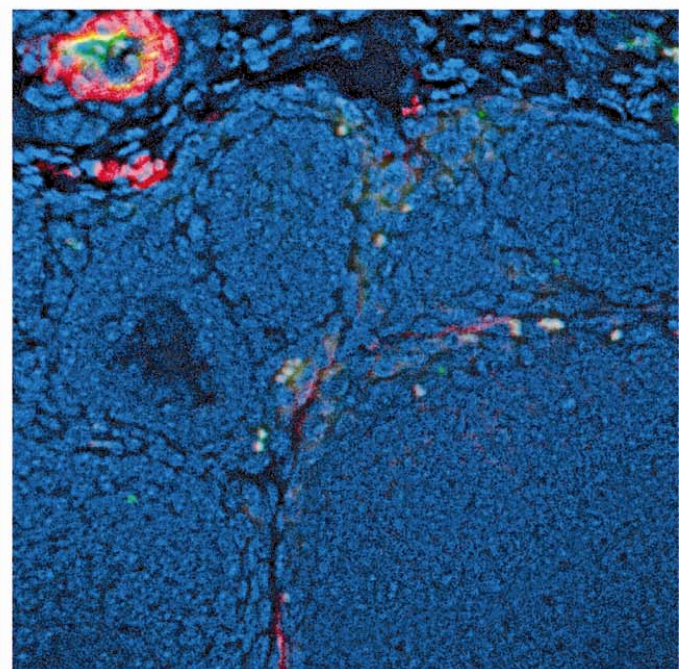

SMA

VWB

SMA and VWB

Supplemental Figure 2

Supplement: me.2008-0391_2.pdf [file me.2008-0391_2.pdf]

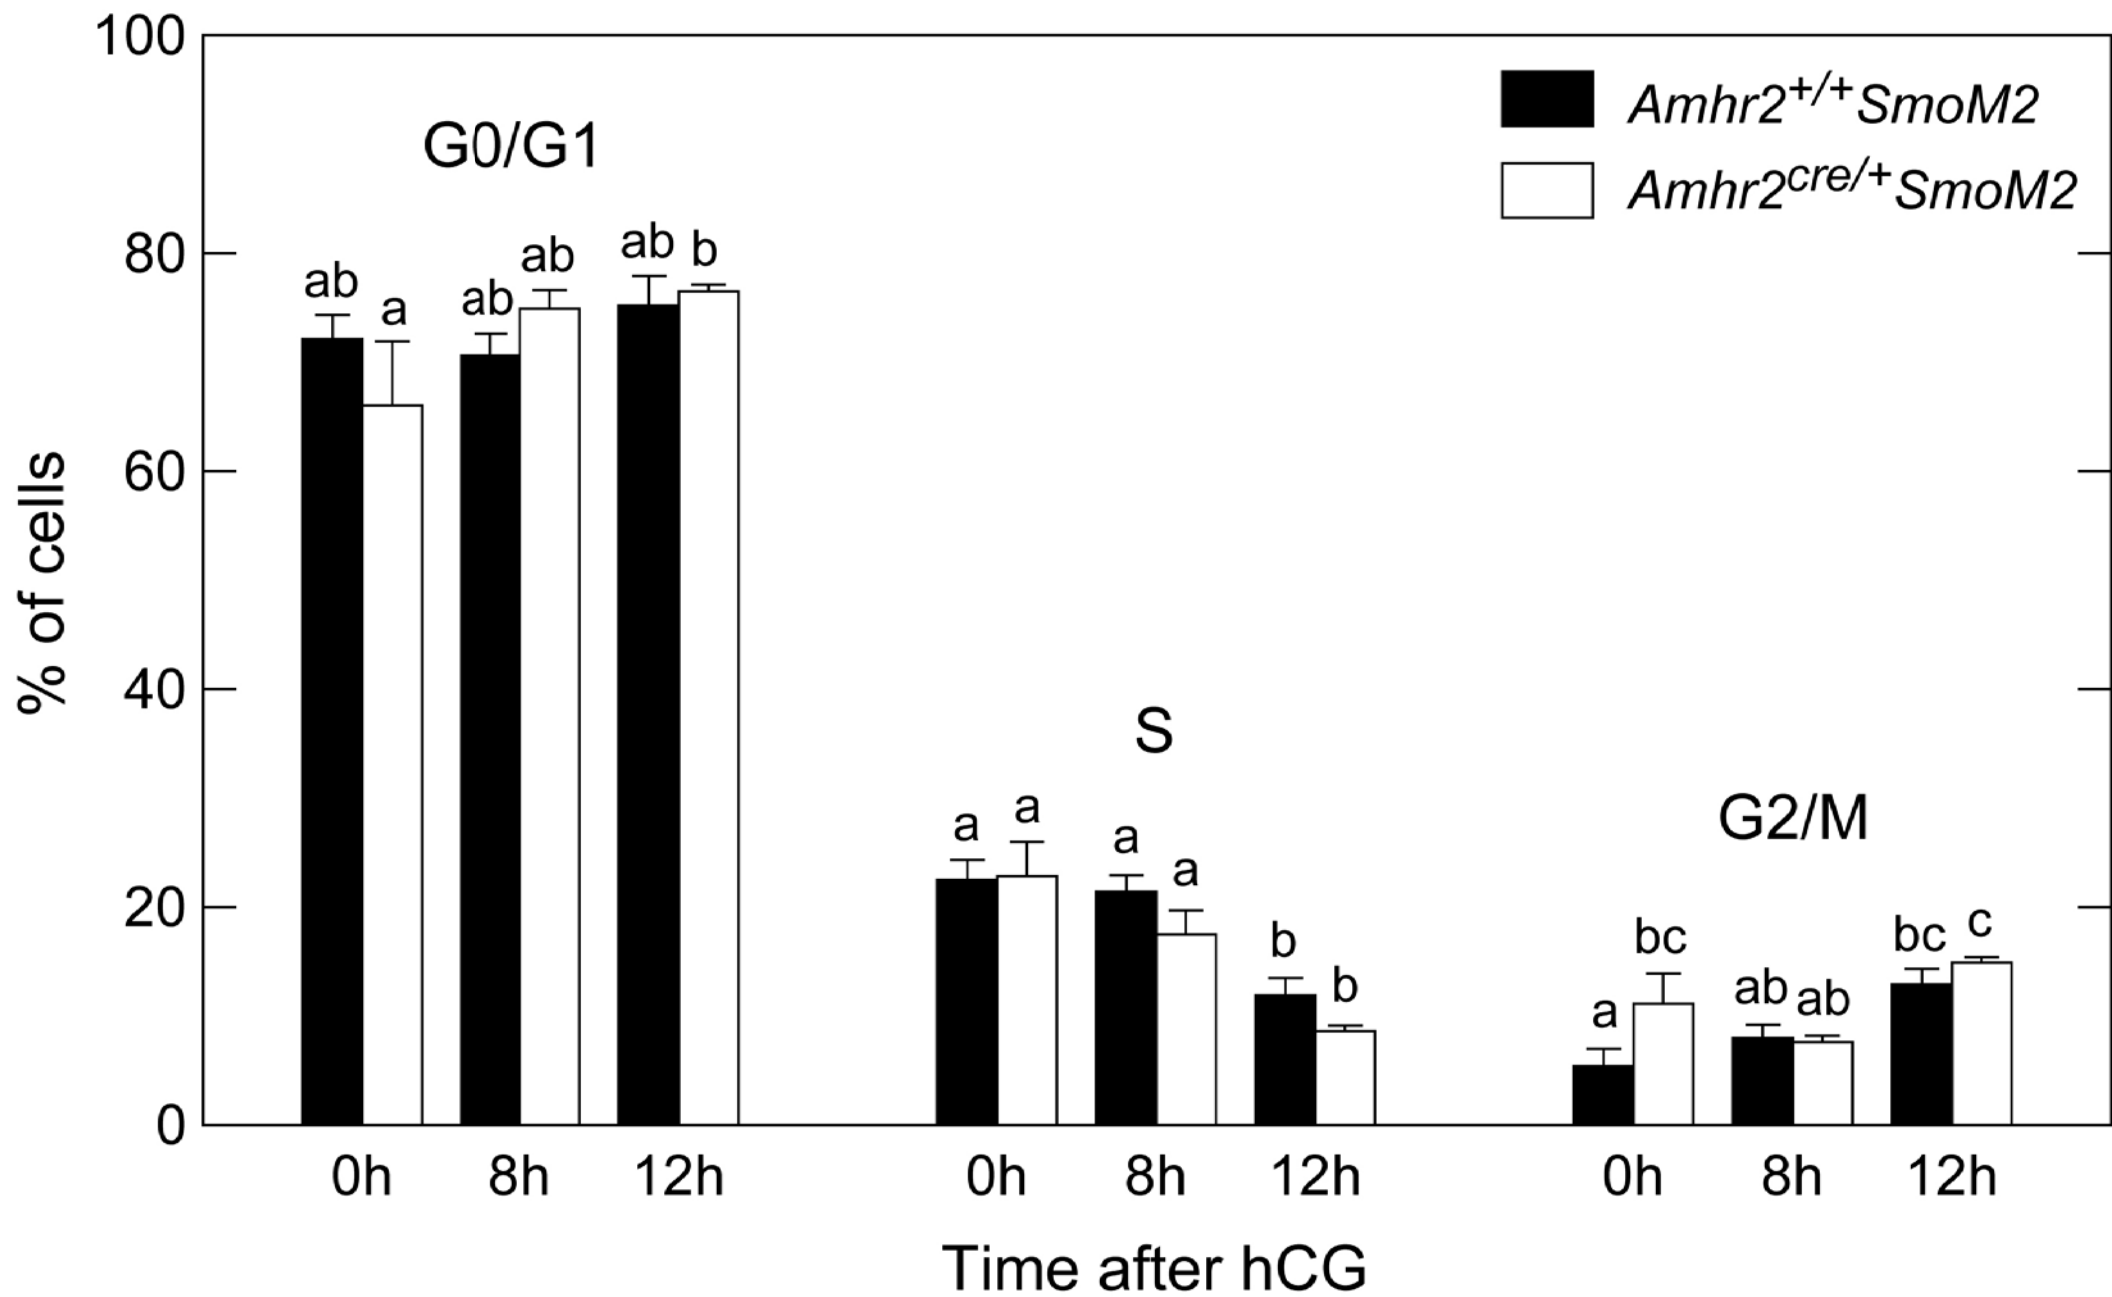

Supplemental figure 3

Supplement: me.2008-0391_3.pdf [file me.2008-0391_3.pdf]
